# Supplementary material for: Mixed halobenzenes also prefer face⋯face approaches of aromatic rings, revealing a new inversion symthon
Source: Royal Society of Chemistry journal article supplement (doi:10.1039/d3ce00276d), 2023-01-01
Supplement: d3ce00276d1.xlsx [file d3ce00276d1.xlsx]

## Sheet: translation
N	halogen positions						CSD	Space	Z'	k	©…©	s	d	©…X	X	notes
							REFCODE	Group			Å	Å	Å	Å
	1	2	3	4	5	6
2	Cl	Cl					ABUMIT01	P21/n	1	1	3.927	3.528	1.72469	3.53	C
2	Cl	Cl					ABUMIT01				3.927	3.528	1.72469	3.55	C
2	Cl		Cl				ABUMOZ	P21/n	2	2	3.923	3.461	1.847	3.49	C	blue
2	Cl		Cl				ABUMOZ				3.923	3.461	1.847	3.5	C	blue
2	Cl		Cl				ABUMOZ				3.923	3.591	1.57945	3.62	C	green
2	Cl		Cl				ABUMOZ				3.923	3.591	1.57945	3.62	C	green
2	Cl			Cl			DCLBEN05	P-1	0.5	1	3.959	3.594	1.66037	3.64	C	beta polymorph
2	Cl			Cl			DCLBEN05				3.959	3.594	1.66037	3.64	C
2	Cl			Cl			DCLBEN01	P21/a	0.5	1	4.039	3.552	1.92271	3.62	C	alpha polymorph
2	Cl			Cl			DCLBEN01				4.039	3.552	1.92271	3.62	C
2	Br		Br				SOFVUG	P212121	2	2	4.106	3.491	2.16152	3.57	C	blue
2	Br		Br				SOFVUG				4.106	3.491	2.16152	3.59	C	blue
2	Br		Br				SOFVUG				4.106	3.622	1.934	3.65	C	green
2	Br		Br				SOFVUG				4.106	3.622	1.934	3.66	C	green
2	Br			Br			CISTON02	P21/n	0.5	1	4.048	3.555	1.93605	3.61	C
2	Br			Br			CISTON02				4.048	3.555	1.93605	3.61	C
2	Cl			Br			BCBENZ03	P21/n	0.5	1	4.024	3.546	1.90223	3.604	C	Cl/B disorder
2	Cl			Br			BCBENZ03				4.024	3.546	1.90223	3.604	C	Cl/B disorder
2	Cl			I			CLIOBZ02	P21/n	0.5	1	4.176	3.654	2.0217	3.739	C	Cl/I disorder
2	Cl			I			CLIOBZ02				4.176	3.654	2.0217	3.739	C	Cl/I disorder
2	Br			I			KUJZUK01	P21/n	0.5	1	4.17	3.638	2.0381	3.723	C	Br/I disorder
2	Br			I			KUJZUK01				4.17	3.638	2.0381	3.723	C	Br/I disorder
3	Cl		Cl		Cl		TCHLBZ	P212121	1	1	3.91	3.526	1.6898	3.54	C
3	Cl		Cl		Cl		TCHLBZ				3.91	3.526	1.6898	3.54	C
3	Cl	Cl		Cl			KUBMAX02	P21/n	2	2	3.846	3.51	1.57214	3.53	C	green
3	Cl	Cl		Cl			KUBMAX02				3.846	3.51	1.57214	3.53	C	green
3	Cl	Cl		Cl			KUBMAX02				3.846	3.458	1.68343	3.48	C	blue
3	Cl	Cl		Cl			KUBMAX02				3.846	3.458	1.68343	3.48	C	blue
3	Br		Br		Br		TBRMBZ	P212121	1	1	4.08	3.586	1.94602	3.63	C
3	Br		Br		Br		TBRMBZ				4.08	3.586	1.94602	3.64	C
3	Br	Br		Br			UYUQAJ	Fdd2	3	3	3.987	3.605	1.70298	3.632	C	blue
3	Br	Br		Br			UYUQAJ				3.987	3.605	1.70298	3.644	C	blue
3	Br	Br		Br			UYUQAJ				3.987	3.636	1.63575	3.67	C	green
3	Br	Br		Br			UYUQAJ				3.987	3.636	1.63575	3.652	C	green
3	Br	Br		Br			UYUQAJ				3.987	3.681	1.5318	3.696	C	red
3	Br	Br		Br			UYUQAJ				3.987	3.681	1.5318	3.673	C	red
3	I		I		I		REBBEG	P212121	1	1	4.329	3.6	2.40421	3.728	C
3	I		I		I		REBBEG				4.329	3.6	2.40421	3.74	C
3	I	I		I			TICGUI	Pba2	1	1	4.324	3.679	2.27199	3.828	C
3	I	I		I			TICGUI				4.324	3.679	2.27199	3.819	C
3	I	Br		Br			IWIKEE	P21/c	1	1	4.075	3.696	1.71616	3.719	C
3	I	Br		Br			IWIKEE				4.075	3.696	1.71616	3.71	C
4	Cl	Cl		Cl	Cl		TCLBEN03	P-1	1*	2	3.802	3.452	1.59339	3.48	C	beta polymorph, blue
4	Cl	Cl		Cl	Cl		TCLBEN03				3.802	3.452	1.59339	3.48	C	blue
4	Cl	Cl		Cl	Cl		TCLBEN03				3.802	3.511	1.4588	3.51	C	green
4	Cl	Cl		Cl	Cl		TCLBEN03				3.802	3.511	1.4588	3.51	C	green
4	Cl	Cl		Cl	Cl		TCLBEN02	P21/n	0.5	1	3.796	3.474	1.53001	3.56	C	alpha polymorph
4	Cl	Cl		Cl	Cl		TCLBEN02				3.796	3.474	1.53001	3.56	C
4	Cl	Cl	Cl	Cl			NILJOK	P21/c	1	1	3.868	3.548	1.54049	3.56	C
4	Cl	Cl	Cl	Cl			NILJOK				3.868	3.548	1.54049	3.57	C
4	Cl	Cl	Cl		Cl		TCLBZN	P21/c	2	2	3.853	3.575	1.43701	3.63	C	green
4	Cl	Cl	Cl		Cl		TCLBZN				3.853	3.575	1.43701	3.63	C	green
4	Cl	Cl	Cl		Cl		TCLBZN				3.853	3.585	1.41187	3.58	C	blue
4	Cl	Cl	Cl		Cl		TCLBZN				3.853	3.585	1.41187	3.58	C	blue
4	Br	Br		Br	Br		TETBBZ06	P21/n	0.5	1	4.011	3.637	1.69126	3.68	C	beta polymorph
4	Br	Br		Br	Br		TETBBZ06				4.011	3.637	1.69126	3.68	C
4	Br	Br		Br	Br		TETBBZ09	P21/n	0.5	1	4.055	3.643	1.78089	3.75	C	gamma (HT) polymorph
4	Br	Br		Br	Br		TETBBZ09				4.055	3.643	1.78089	3.75	C
4	I	I		I	I		TERLOS02	P21/n	0.5	1	4.113	3.689	1.8188	3.726	C
4	I	I		I	I		TERLOS02				4.113	3.689	1.8188	3.726	C
4	Cl	I	Cl		Cl		ENIVUS	P21/c	1	1	3.997	3.601	1.73459	3.664	C
4	Cl	I	Cl		Cl		ENIVUS				3.997	3.601	1.73459	3.668	C
4	Cl	Cl		I	I		HUXGAL	P-1	2	2	4.123	3.69	1.8393	3.75	C	green
4	Cl	Cl		I	I		HUXGAL				4.123	3.69	1.8393	3.731	C	green
4	Cl	Cl		I	I		HUXGAL				4.123	3.679	1.86121	3.724	C	blue
4	Cl	Cl		I	I		HUXGAL				4.123	3.679	1.86121	3.73	C	blue
4	I	Cl		Cl	Cl		IJENEQ	P21/n	0.5	1	3.919	3.558	1.64292	3.633	C	Cl/I disorder
4	I	Cl		Cl	Cl		IJENEQ				3.919	3.558	1.64292	3.633	C	Cl/I disorder
4	Cl	I	Cl	Cl			NEQKOK	Pca21	1	1	4.053	3.599	1.86387	3.679	C	Cl/I disorder
4	Cl	I	Cl	Cl			NEQKOK				4.053	3.599	1.86387	3.676	C	Cl/I disorder
4	I	Br	I		Cl		EQAMAL	P21	2	2	4.146	3.672	1.92503	3.735	C	green
4	I	Br	I		Cl		EQAMAL				4.146	3.672	1.92503	3.759	C	green
4	I	Br	I		Cl		EQAMAL				4.146	3.703	1.8647	3.746	C	blue
4	I	Br	I		Cl		EQAMAL				4.146	3.703	1.8647	3.738	C	blue
5	Cl	Cl	Cl	Cl	Cl		PNCLBZ	Pca21	1	1	3.856	3.538	1.53339	3.58	C
5	Cl	Cl	Cl	Cl	Cl		PNCLBZ				3.856	3.538	1.53339	3.58	C
6	Cl	Cl	Cl	Cl	Cl	Cl	HCLBNZ11	P21/n	0.5	1	3.836	3.523	1.51768	3.57	C
6	Cl	Cl	Cl	Cl	Cl	Cl	HCLBNZ11	P21/n			3.836	3.523	1.51768	3.57	C
6	Br	Br	Br	Br	Br	Br	HBRBEN	P21/n	0.5	1	4.007	3.634	1.68822	3.62	C
6	Br	Br	Br	Br	Br	Br	HBRBEN				4.007	3.634	1.68822	3.62	C
6	I	I	I	I	I	I	HIBENZ01	P21/n	0.5	1	4.29	3.866	1.85961	3.88	C
6	I	I	I	I	I	I	HIBENZ01				4.29	3.866	1.85961	3.88	C
6	Cl	Br	Cl	Br	Cl	Br	UCENUM	P21/n	0.5	1	3.8619	3.518	1.59309	3.552	C	Br/Cl disorder
6	Cl	Br	Cl	Br	Cl	Br	UCENUM				3.8619	3.518	1.59309	3.552	C	Br/Cl disorder
6	Cl	Cl	Cl	Br	Br	Br	UCEPUO	P21/n	0.5	1	3.9429	3.617	1.56964	3.643	C	Br/Cl disorder
6	Cl	Cl	Cl	Br	Br	Br	UCEPUO				3.9429	3.617	1.56964	3.643	C	Br/Cl disorder
6	Br	Cl	Cl	Br	Cl	Cl	DBTCBE01	P21/n	0.5	1	3.8484	3.491	1.6196	3.523	C	Br/Cl disorder
6	Br	Cl	Cl	Br	Cl	Cl	DBTCBE01				3.8484	3.491	1.6196	3.523	C	Br/Cl disorder
6	Br	Br	Cl	Br	Br	Cl	DBTCBE02	P21/n	0.5	1	3.8704	3.512	1.62661	3.54	C	Br/Cl disorder
6	Br	Br	Cl	Br	Br	Cl	DBTCBE02				3.8704	3.512	1.62661	3.54	C	Br/Cl disorder
6	Br	Br	Br	Br	Br	Cl	PBRCLB01	P21/n	0.5	1	3.9205	3.556	1.65081	3.594	C	Br/Cl disorder
6	Br	Br	Br	Br	Br	Cl	PBRCLB01				3.9205	3.556	1.65081	3.594	C	Br/Cl disorder
6	Br	I	Br	I	Br	I	UCENOG	P21/n	0.5	1	4.0444	3.647	1.7483	3.689	C	Br/I disorder, polymorph I
6	Br	I	Br	I	Br	I	UCENOG				4.0444	3.647	1.7483	3.689	C	Br/I disorder
6	Cl	I	I	Cl	I	I	UCEPOI	P21/n	0.5	1	4.2989	3.76	2.08397	3.87	C
6	Cl	I	I	Cl	I	I	UCEPOI				4.2989	3.76	2.08397	3.87	C
6	Cl	Cl	Cl	I	I	I	UCEQAV	P21/n	0.5	1	4.117	3.787	1.61503	3.819	C	Cl/I disorder
6	Cl	Cl	Cl	I	I	I	UCEQAV				4.117	3.787	1.61503	3.819	C	Cl/I disorder
6	Cl	Cl	I	Cl	I	I	UCEQEZ	P21/n	0.5	1	4.1087	3.656	1.87485	3.717	C	Cl/I disorder
6	Cl	Cl	I	Cl	I	I	UCEQEZ				4.1087	3.656	1.87485	3.717	C	Cl/I disorder
6	I	Cl	Cl	I	Cl	Cl	UCEQID	P21/n	0.5	1	4.1259	3.69	1.84579	3.731	C	Cl/I disorder, polymorph I
6	I	Cl	Cl	I	Cl	Cl	UCEQID				4.1259	3.69	1.84579	3.731	C	Cl/I disorder
6	Br	Br	I	Br	I	I	UCEQOJ	P21/n	0.5	1	4.0812	3.651	1.82384	3.702	C	Br/I disorder
6	Br	Br	I	Br	I	I	UCEQOJ				4.0812	3.651	1.82384	3.702	C	Br/I disorder
6	Cl	Cl	Cl	Cl	Cl	I	KANRIE	P21/n	0.5	1	3.9138	3.53	1.69025	3.561	C	Cl/I disorder
6	Cl	Cl	Cl	Cl	Cl	I	KANRIE				3.9138	3.53	1.69025	3.561	C	Cl/I disorder
6	Br	I	Br	I	Br	I	UCENOG02	P21/n	0.5	1	4.198	3.708	1.96823	3.803	C	Br/I disorder, polymorph II
6	Br	I	Br	I	Br	I	UCENOG02				4.198	3.708	1.96823	3.803	C	Br/I disorder
6	Br	I	I	Br	I	I	UCEPIC	P21/n	0.5	1	4.261	3.795	1.93755	3.851	C
6	Br	I	I	Br	I	I	UCEPIC				4.261	3.795	1.93755	3.851	C
6	I	Cl	Cl	I	Cl	Cl	UCEQID01	P21/n	0.5	1	5.968	3.792	4.60844	4.013	I	polymorph II
6	I	Cl	Cl	I	Cl	Cl	UCEQID01				5.968	3.792	4.60844	4.013	I
									1* = 0.5 x 2
							Blue REFCODES indicate isostructures with N = 6
							Brown REFCODES indicate 1,4-dihalobenzene isostructures
							Green REFCODES indicate 1,3,5-trihalohenzene isostructures
							Only the two interactions in UCEQID01 are not Symthon I

## Sheet: inversion 
N	halogen positions						CSD	Space	Z'	k	©…©	s	d	©…X	X	notes
							REFCODE	Group			Å	Å	Å	Å
	1	2	3	4	5	6
3	Cl	Cl	Cl				TCBENZ	P21/c	2	2	3.676	3.535	1.00834	3.54	C	blue
3	Cl	Cl	Cl				TCBENZ				3.614	3.527	0.788205	3.58	C	green
3	Br	Br	Br				UYUPIQ	P21/c	2	2	3.677	3.574	0.864207	3.612	C	green
3	Br	Br	Br				UYUPIQ				3.697	3.54	1.06593	3.558	C	blue
3	I	I	I				REWFUV	P212121	2	2	3.701	3.585	0.919335	3.64	C	blue 1
3	I	I	I				REWFUV				3.633	3.605	0.450182	3.7	C	blue 2
3	I	I	I				REWFUV				5.37	3.938	3.6509	3.865	I	green
3	Br	I	I				ZURGEA	P21/c	1	1	3.746	3.591	1.06641	3.608	C
3	I	Br	I				IWIKII	P21/c	1	1	3.904	3.608	1.49116	3.677	C
3	Cl	I	Cl				ISAWIK	P-1	4	4	3.696	3.496	1.19933	3.513	C	green
3	Cl	I	Cl				ISAWIK				3.609	3.417	1.16146	3.434	C	blue
3	Cl	I	Cl				ISAWIK				4.03	3.766	1.43462	3.786	C	yellow 1
3	Cl	I	Cl				ISAWIK				3.808	3.679	0.982763	3.752	C	yellow 2
3	Cl	I	Cl				ISAWIK				4.429	3.48	2.73964	3.54	Cl	red
3	I	I		Br			OPAYUA	P42/n	1	1	3.925	3.624	1.5074	3.677	C
3	I	I		Br			OPAYUA				4.054	3.62	1.82497	3.7	C
4	Cl	I	Cl		Br		ACEPOO	P21/c	2	2	4.43	3.81	2.26027	3.898	C	green
4	Cl	I	Cl		Br		ACEPOO				4.193	3.662	2.0423	3.783	C	blue
6	Br	I	Br	I	Br	I	UCENOG01	P-1	1	1	4.12	3.663	1.88596	3.762	C
6	Br	I	Br	I	Br	I	UCENOG01				4.079	3.658	1.80479	3.758	C
6	Cl	I	Cl	I	Cl	I	UCEPAU	P-1	1	1	3.958	3.598	1.64929	3.683	C
6	Cl	I	Cl	I	Cl	I	UCEPAU				4.028	3.582	1.8423	3.643	C
							10 x d < 1.3Å in grey
							2 x d > 2.5Å in bold - not Symthon III

## Sheet: face...face other
N	halogen positions						CSD	Space	Z'	k	©…©	θ	©…X	X	Symmetry	notes
							REFCODE	Group			Å	˚	Å
	1	2	3	4	5	6
3	I	I		Cl			OPAYOU	P21	2	2	3.875	4.2	3.441	C	asymmetric	green/blue
3	I	I		Cl			OPAYOU				3.875	4.2	3.576	C	asymmetric	blue/green
3	I	I		Cl			OPAYOU				4.835	4.2	3.829	I	asymmetric	blue/green
3	I	I		Cl			OPAYOU				4.835	4.2	3.937	I	asymmetric	green/blue
3	Cl	I	Cl				ISAWIK	P-1	4	4	4.023	13.9	3.385	C	asymmetric	blue/green
3	Cl	I	Cl				ISAWIK				4.023	13.9	3.646	C	asymmetric	green/blue
4	Cl	I	Cl		Br		ACEPOO	P21/c	2	2	3.758	10.8	3.698	C	asymmetric	blue/green
4	Cl	I	Cl		Br		ACEPOO				3.758	10.8	3.413	C	asymmetric	green/blue
4	I	I		I	I		TERLOS	P2/c	1*	2	3.956	5	3.718	C	2-fold rotation/glide	green
4	I	I		I	I		TERLOS				3.956	5	3.718	C	2-fold rotation/glide	green
4	I	I		I	I		TERLOS				3.956	3.5	3.686	C	2-fold rotation/glide	blue
4	I	I		I	I		TERLOS				3.956	3.5	3.686	C	2-fold rotation/glide	blue
									1* = 0.5 x 2

## Sheet: edge...face
N	halogen positions						CSD	Space	Z'	k	©…C	C…C	©…X	C…Y	X	Y	symmetry	polymorph	Z' > 1 approaches
							REFCODE	Group			Å	Å	Å	Å
	1	2	3	4	5	6
0							BENZEN	Pbca	0.5	1	3.783	3.739					screw/glide	Form I
0							BENZEN				3.783	3.739					screw/glide
0							BENZEN03	P21/c	0.5	1	3.436	3.56					screw/glide	Form II
0							BENZEN03				3.436	3.56					screw/glide
0							BENZEN16	P21/c	0.5	1	3.505	3.64					screw/glide	Form III
0							BENZEN16				3.505	3.64					screw/glide
1	Cl						MCBENZ03	Pbcn	1	1	3.627	4.04					screw
1	Cl						MCBENZ03				3.76	3.544					glide
1	I						REKYAI	Pbcn	1	1	3.663	3.66					glide	polymorph 1
1	I						REKYAI				3.923	4.327					screw
1	I						REKYAI01	P212121	2	2	3.568	3.529					asymmetric	polymorph 2	green edge…blue face
1	I						REKYAI01				4.157	4.504					screw		blue edge…blue face
1	I						REKYAI01				3.633	3.579					asymmetric		blue edge…green face
1	I						REKYAI01				3.682	4.075					screw		green edge…green face
2	Cl			Cl			DCLBEN04	P21/a	0.5	1	3.635	3.956					screw/glide	gamma polymorph
2	Cl			Cl			DCLBEN04				3.635	3.956					screw/glide
2	Br	Br					SOFWIV	Pbca	1	1	3.745	4.312					glide
2	Br	Br					SOFWIV				3.614	3.972					screw
2	I			I			ZZZPRO05	Pbca	0.5	1	3.62	3.854					screw/glide	RT polymorph
2	I			I			ZZZPRO05				3.62	3.854					screw/glide
2	I			I			ZZZPRO07	Pccn	0.5	1	3.661	3.88					screw/glide	HT polymorph
2	I			I			ZZZPRO07				3.661	3.88					screw/glide
3	Cl	Cl	Cl				TCBENZ	P21/c	2	2	4.975	5.101	3.483	3.869	Cl	Cl	asymmetric		blue edge…green face
3	Cl	Cl	Cl				TCBENZ				4.957	5.142	3.363	4.088	Cl	Cl	asymmetric		green edge…blue face
3	I	I	I				REWFUV	P212121	2	2	5.43	5.48	3.944	4.548	I	I	asymmetric		blue edge…green face
3	Br	Br	Br				UYUPIQ	P21/c	2	2	5.153	5.292	3.525	3.964	Br	Br	asymmetric		blue edge…green face
3	Br	Br	Br				UYUPIQ				5.15	5.351	3.451	4.12	Br	Br	asymmetric		green edge…blue face
3	Br	I	I				ZURGEA	P21/c	1	1	5.366	5.478	3.646	4.028	I	I	glide
3	I	Br	I				IWIKII	P21/c	1	1	5.299	5.23	3.637	3.786	I	Br	screw
3	Cl	I	Cl				ISAWIK	P-1	4	4	3.818	4.314			C	Cl	asymmetric		blue edge…red face
							grey indicates approaches that are not Symthon II

## Sheet: 1,4-isostructures
	first	second	1:2	a	b	c	beta	REFCODE
	molecule	molecule	ratio	Å	Å	Å	˚
1	Br, Br		1	15.49	5.84	4.11	112.7	CISTON
2	Br, Cl		1	15.49	5.84	4.07	112.5	BCBENZ02
3	Cl, Cl		1	14.79	5.84	4.04	112.5	DCLBEN08
4	Cl, I		1	15.82	5.91	4.21	113.6	CLIOBZ01
5	Br, I		1	16.2	5.87	4.23	113.9	KUJZUK
6	Br, Br	Cl, I	0.9	15.52	5.85	4.12	112.8	VECWEF
7	Br, Br	Cl, I	0.7	15.58	5.86	4.14	113	VECWEF01
8	Br, Br	Cl, I	0.4	15.69	5.89	4.18	113.3	VECWUV01
9	Br, Br	Cl, I	0.1	15.79	5.91	4.21	113.6	VECWUV
10	Br, Cl	Cl, Cl	0.9	15.1	5.84	4.07	112.5	KAHPAK
11	Br, Cl	Cl, Cl	0.8	15.07	5.84	4.07	112.5	KAHPAK01
12	Br, Cl	Cl, Cl	0.7	15.03	5.84	4.06	112.5	KAHPAK02
13	Br, Cl	Cl, Cl	0.6	15	5.84	4.06	112.5	KAHPAK03
14	Br, Cl	Cl, Cl	0.5	14.96	5.84	4.06	112.5	KAHPAK04
15	Br, Cl	Cl, Cl	0.4	14.93	5.84	4.05	112.5	CISVAB03
16	Br, Cl	Cl, Cl	0.3	14.89	5.85	4.05	112.5	CISVAB02
17	Br, Cl	Cl, Cl	0.2	14.85	5.84	4.04	112.5	CISVAB01
18	Br, Cl	Cl, Cl	0.1	14.81	5.84	4.04	112.5	CISVAB
19	Br, Br	Cl, Cl	0.9	15.45	5.84	4.1	112.7	CISWIK
20	Br, Br	Cl, Cl	0.8	15.41	5.84	4.1	112.7	CISWIK01
21	Br, Br	Cl, Cl	0.7	15.37	5.84	4.09	112.6	CISWIK02
22	Br, Br	Cl, Cl	0.6	15.3	5.84	4.08	112.5	CISWIK03
23	Br, Br	Cl, Cl	0.5	15.24	5.84	4.08	112.7	CISWIK04
24	Br, Br	Cl, Cl	0.4	15.14	5.84	4.07	112.6	CISTUT03
25	Br, Br	Cl, Cl	0.3	15.02	5.85	4.06	112.5	CISTUT02
26	Br, Br	Cl, Cl	0.2	14.94	5.84	4.05	112.5	CISTUT01
27	Br, Br	Cl, Cl	0.1	14.89	5.84	4.05	112.5	CISTUT
28	Br, Cl	Br, Br	0.9	15.18	5.85	4.08	112.6	DUFNIB
29	Br, Cl	Br, Br	0.8	15.22	5.85	4.08	112.6	DUFNIB01
30	Br, Cl	Br, Br	0.7	15.26	5.84	4.08	112.6	DUFNIB02
31	Br, Cl	Br, Br	0.6	15.3	5.84	4.09	112.6	DUFNIB03
32	Br, Cl	Br, Br	0.5	15.34	5.84	4.09	112.6	DUFRAX04
33	Br, Cl	Br, Br	0.4	15.37	5.84	4.1	112.6	DUFRAX03
34	Br, Cl	Br, Br	0.3	15.4	5.84	4.1	112.7	DUFRAX02
35	Br, Cl	Br, Br	0.2	15.44	5.84	4.1	112.7	DUFRAX01
36	Br, Cl	Br, Br	0.1	15.47	5.84	4.1	112.7	DUFRAX
37	Cl, I	Br, Br	0.9	15.76	5.91	4.2	113.6	FIYVOH
38	Cl, I	Br, Br	0.8	15.69	5.91	4.2	113.4	FIYVOH01
39	Cl, I	Br, Br	0.7	15.62	5.9	4.18	113.3	FIYVOH02
40	Cl, I	Br, Br	0.6	15.57	5.9	4.17	113.2	FIYVOH03
41	Cl, I	Br, Br	0.5	15.49	5.9	4.16	113.1	FIYVOY04
42	Cl, I	Br, Br	0.4	15.42	5.89	4.14	113	FIYVOY03
43	Cl, I	Br, Br	0.3	15.36	5.88	4.13	112.9	FIYVOY02
44	Cl, I	Br, Br	0.2	15.29	5.87	4.11	112.8	FIYVOY01
45	Cl, I	Br, Br	0.1	15.21	5.86	4.09	112.6	FIYVOY
ranges	all		14.79-16.2		5.84-5.91	4.04-4.21	112.5-113.9
	just CB		14.59-15.49		5.84-5.85	4.04-4.11	112.5-112.7

## Sheet:  N=6 isostructures
	REFCODE	a	b	c	beta
		Å	Å	Å	˚
1	HCLBNZ11	8.07	3.84	14.82	92.1
2	HBRBEN02	8.33	3.95	15.27	92.4
3	HIBENZ01	8.87	4.29	16.28	93
4	DBTCBE	8.15	3.87	15.01	92.4
5	UCEPUO	8.26	3.94	15.14	92.3
6	DBTCBE01	8.06	3.84	14.91	92.2
7	PERCLB01	8.27	3.92	15.2	92.7
8	UCENUM	8.19	3.86	15.04	92.8
9	UCEQOJ	8.5	4.08	15.7	92.7
10	UCEQEZ	8.7	4.11	15.1	93.6
11	UCEQAV	8.72	4.12	15.58	92.7
12	UCEQID	8.64	4.13	15.74	92.1
13	UCENOG	8.5	4.04	15.61	92.8
14	KANRIE	8.12	3.91	15.07	92
	P21/a	17.8	4.01	14.42	111.2
